# Supplementary material for: Pre-phosphorylation for facile production of phosphorylated cellulose nanocrystals with high charge content: an optimised design and life cycle assessment
Source: Royal Society of Chemistry journal article supplement (doi:10.1039/d3gc00478c), 2023-01-01
Supplement: d3gc00478c1.pdf [file d3gc00478c1.pdf]

## Supporting Information

### **Pre-phosphorylation for facile production of phosphorylated cellulose nanocrystals with high charge content: An optimized design and life cycle assessment**

*Xue Gao*<sup>a,1</sup>, *Lei Zhang*<sup>a,1</sup>, *Mei Cui*<sup>a,\*</sup>, *Renliang Huang*<sup>b,c</sup>, *Wei Qi*<sup>a</sup>, *Rongxin Su*<sup>a,b,c,\*</sup>

<sup>a</sup> State Key Laboratory of Chemical Engineering, Tianjin Key Laboratory of Membrane Science and Desalination Technology, School of Chemical Engineering and Technology, Tianjin University, Tianjin, 300072, PR China

<sup>b</sup> Zhejiang Institute of Tianjin University, Ningbo, Zhejiang, 315201, PR China

<sup>c</sup> Key Laboratory of Ocean Observation Technology of Ministry of Natural Resources, School of Marine Science and Technology, Tianjin University, Tianjin, 300072, PR China

<sup>1</sup> These two authors contributed equally to this work.

\* Author to whom correspondence should be addressed:

meicui@tju.edu.cn (M.C.), surx@tju.edu.cn (R.S.)

Number of Pages: 15

Number of Tables: 6

Number of Figures: 4

**Table S1** Comparison of production processes and properties of P-CNCs prepared from different manufacturing methods.

| Modification types             | Raw materials                | Cellulose content (wt%) | Phosphorylation methods                                                                                                           | Crystallinity index (%)                                                                        | Size (L, D)                      | Charge content (mmol/kg) | Zeta potential (mV) | Yield (%) | Ref.      |
|--------------------------------|------------------------------|-------------------------|-----------------------------------------------------------------------------------------------------------------------------------|------------------------------------------------------------------------------------------------|----------------------------------|--------------------------|---------------------|-----------|-----------|
| <i>In-situ</i> phosphorylation | Giant reed                   | 33–49.4                 | Phosphoric acid hydrolysis (9 mol/L, 2 h, 60 °C)                                                                                  | 83                                                                                             | L/D=33                           | 254                      | NA                  | NA        | 1         |
|                                | Tomato plant residue         | 33                      | Phosphoric acid hydrolysis (9 mol/L, 2 h, 100 °C)                                                                                 | 81                                                                                             | L=670±115 nm<br>D=6.2±2.4 nm     | 79.2                     | –37.3               | NA        | 2         |
|                                | Eggplant plant residue       | 62.5                    | Phosphoric acid hydrolysis (9 mol/L, 2 h, 100 °C)                                                                                 | 73                                                                                             | L=597.5±163.1 nm<br>D=6.3±2.3 nm | 116.7                    | –39.4               | NA        | 3         |
|                                | Hardwood kraft pulp          | NA                      | Phosphoric acid hydrolysis (75 wt%, 5 h, 70 °C)                                                                                   | 82                                                                                             | L=200 nm<br>D=8–15 nm            | 200                      | –31                 | NA        | 4         |
|                                | Date palm sheath             | 42.7                    | Phosphoric acid hydrolysis (10.7 mol/L, 30 min, 90 °C)                                                                            | 83                                                                                             | L=94.77 nm<br>D=16.42 nm         | 0.23 <sup>a</sup>        | –12.7               | 55.57     | 5         |
|                                | Cellulose bioethanol residue | 50                      | Phosphoric acid hydrolysis (10.7 mol/L, 30 min, 100 °C)                                                                           | 83                                                                                             | L=610 nm                         | 435.21                   | –28 <sup>b</sup>    | 85–89     | 6         |
|                                | Cellulose bioethanol residue | 50                      | Phosphoric acid in molten urea (10.7 mol/L, 30 min, 150 °C)                                                                       | 86                                                                                             | D=5–10 nm                        | 1038.05                  | –35 <sup>b</sup>    | 91        | 6         |
|                                | Cotton/Filter paper          | NA                      | Phosphoric acid hydrolysis (10.7 mol/L, 90 min, 100 °C)                                                                           | 81                                                                                             | L=316±127 nm<br>D=31±14 nm       | 10.8±2.7                 | NA                  | 76–80     | 7         |
|                                | Post-phosphorylation         | CNCs                    | 100                                                                                                                               | CNC:P <sub>4</sub> O <sub>10</sub> :urea =1:1:10, ball-milling mechanochemical process, 90 min | 21                               | L=107±46 nm<br>D=12±2 nm | 3300                | NA        | NA        |
| CNCs                           |                              | 100                     | 1 wt% CNC dispersion, (NH <sub>4</sub> ) <sub>2</sub> HPO <sub>4</sub> :urea=1:5, drying at 70 °C and curing at 150 °C for 60 min | 50.2                                                                                           | NA                               | 1478                     | –35                 | NA        | 9,10      |
| Pre-phosphorylation            | MCC                          | 100                     | MCC:NH <sub>4</sub> H <sub>2</sub> PO <sub>4</sub> :urea=1:0.3:1.2, drying at 70 °C and curing at 150 °C for 30 min               | 87.3                                                                                           | L=240±90 nm<br>D=11.9±5.6 nm     | 2334                     | –27.1               | 92.4      | This work |

<sup>a</sup> The degree of substitution (DS) was calculated from conductometric titration,  $DS = (162 \times V_{eq} \times C_{NaOH}) / (m - y \times V_{eq} \times C_{NaOH})$ . <sup>b</sup> Measurement at pH=7.5. <sup>c</sup> NA: Not available.

**Table S2** Input and output data of Route 1, 2, and 3 with the function unit of 1 g of P-CNCs.

| Categories |           | Unit                                             | Value           |                 |                 | Background data source |                                                                                                                     |                                          |
|------------|-----------|--------------------------------------------------|-----------------|-----------------|-----------------|------------------------|---------------------------------------------------------------------------------------------------------------------|------------------------------------------|
|            |           |                                                  | R1 <sup>a</sup> | R2 <sup>b</sup> | R3 <sup>c</sup> |                        |                                                                                                                     |                                          |
| Input      | Materials | Paper pulp                                       | g               | 1.202           | 1.282           | 2.164                  | Bleached softwood kraft pulp from the reference                                                                     |                                          |
|            |           | H <sub>3</sub> PO <sub>4</sub><br>(v/v=85%)      | g               | /               | 217.814         | /                      | Phosphate, market average (China); CLCD-China-ECER 0.8                                                              |                                          |
|            |           | H <sub>2</sub> SO <sub>4</sub><br>(98 wt%)       | g               | 0.018           | /               | 16.688                 | Sulfuric acid, market average (China); CLCD-China-ECER 0.8                                                          |                                          |
|            |           | CaO                                              | g               | 0.01            | /               | /                      | Lime production (China); <a href="mailto:lcacontest-s-85y6@ike-global.com">lcacontest-s-85y6@ike-global.com</a> 1.0 |                                          |
|            |           | NaOH<br>(30 wt%)                                 | g               | /               | /               | 44.461                 | Sodium hydroxide (30%), market average (China); CLCD-China-ECER 0.8                                                 |                                          |
|            |           | NaClO<br>(available chlorine 15%)                | g               | /               | /               | 0.071                  | Sodium hypochlorite (available chlorine 15%) (China); CLCD-China-ECER 0.8                                           |                                          |
|            |           | (NH <sub>4</sub> ) <sub>2</sub> HPO <sub>4</sub> | g               | /               | /               | 0.883                  | Diammonium hydrogen phosphate (China); CLCD-China-ECER 0.8                                                          |                                          |
|            |           | NH <sub>4</sub> H <sub>2</sub> PO <sub>4</sub>   | g               | 0.234           | /               | /                      | Ammonium dihydrogen phosphate (China); CLCD-China-ECER 0.8                                                          |                                          |
|            |           | CO(NH <sub>2</sub> ) <sub>2</sub>                | g               | 0.487           | /               | 2.007                  | Urea (China); CLCD-China-ECER 0.8                                                                                   |                                          |
|            |           | Water                                            | g               | 286.819         | 2993.590        | 3377.434               | Tap water (China, industrial); CLCD-China-ECER 0.8                                                                  |                                          |
|            |           | Total                                            | g               | 287.77          | 3212.686        | 3443.708               |                                                                                                                     |                                          |
|            |           | Heat                                             | Natural gas     | g               | 0.12            | /                      | /                                                                                                                   | Natural gas (China); CLCD-China-ECER 0.8 |
|            |           |                                                  | Heat            | kJ              | 5.411           | /                      | /                                                                                                                   | Heat (China, at a temperature level of   |

|        | Electricity | P-CNC production                | kW·h | 0.565   | 0.365    | 0.983    | 55°C); ELCD 3.0<br>China power grid transmission (China, to users); display@ike-global.com 0.9 |
|--------|-------------|---------------------------------|------|---------|----------|----------|------------------------------------------------------------------------------------------------|
| Output | Product     | P-CNCs (1.0%)                   | g    | 100     | 100      | 100      |                                                                                                |
|        | Wastewater  | Water                           | g    | 188.201 | 2937.305 | 3317.853 |                                                                                                |
|        |             | H <sub>3</sub> PO <sub>4</sub>  | g    | /       | 197.579  | /        |                                                                                                |
|        |             | P                               | g    | 0.017   | 62.5     | 0.207    |                                                                                                |
|        |             | N                               | g    | 0.074   | /        | 0.22     |                                                                                                |
|        |             | BOD                             | g    | 0.192   | 0.334    | 1.414    |                                                                                                |
|        |             | COD                             | g    | 0.205   | 0.334    | 3.02     |                                                                                                |
|        | Waste gas   | NH <sub>3</sub>                 | g    | 0.221   | /        | 1.097    |                                                                                                |
|        | Waste       | CaSO <sub>4</sub>               | g    | 0.025   | /        | /        |                                                                                                |
|        |             | Na <sub>2</sub> SO <sub>4</sub> | g    | /       | /        | 23.68    |                                                                                                |
|        |             | Sludge                          | g    | 0.119   | /        | /        |                                                                                                |

**Assumptions:**

1. MCC in Route 1 was produced from the paper pulp.
2. The total P in Route 2 was discharged into the wastewater in the form of H<sub>3</sub>PO<sub>4</sub>.
3. The yield of post-phosphorylation during P-CNC production in Route 3 was equal to that of Route 1 (92.41%, the production yield from MCC to P-CNCs).
4. The mass of NH<sub>3</sub> in Route 3 was equal to the mass loss in the curing process.
5. The dialysis process in Routes 2 and 3 were both performed for 5 days, and the water was changed every day, with 800 mL being used

---

each time.

6. For COD and BOD calculation, the results were calculated by material balance and all organics originated from polymeric cellulose as  $(C_6H_{10}O_5)_n$  and urea as  $CO(NH_2)_2$ , and BOD amount was equal to that of COD produced by cellulose polysaccharides (except the cellulose used for the production of P-CNCs), as urea was degraded by microorganisms without oxygen consumption.

7. The total P and N,  $NH_3$  and  $Na_2SO_4$  contents were all calculated based on material balance.

**Notes:**

**a. P-CNC production process based on pre-phosphorylation (Route 1 of this work):**

1. Inventory data of MCC production process from pulp were acquired from reference 11, and CaO was used to neutralize hydrolysates here.
2. The results of the total P and N were measured directly.
3. The calculations of COD and BOD were the sum of the measured values of wastewater and the COD/BOD amount produced by organics.

**b. P-CNC production process based on *in-situ* phosphorylation (Route 2 of phosphoric acid hydrolysis):**

1. Inventory data were based on the reference 7, and the production yield was regarded as 78%.

**c. P-CNC production process based on post-phosphorylation (Route 3 of CNC surface modification in phosphate salt and urea solution):**

1. Inventory data were based on the reference 8 and 12, while the raw material was changed from cotton to paper pulp.

---

**Calculation:**

1. COD amount of organics was determined by the equation proposed by Wang et al.,<sup>13</sup>

$$m_{COD} = m_{C_6H_{10}O_5} \times 1.185 + m_{CO(NH_2)_2} \times 0.8 \quad (1)$$

which was based on UV-Vis spectrophotometry.

2. For NH<sub>3</sub> calculation in R1,

$$m_{NH_3} = (m_{total\ N} - m_N) / 14 \times 17 \quad (2)$$

where  $m_{total\ N}$  refers to the total N from NH<sub>4</sub>H<sub>2</sub>PO<sub>4</sub> and urea,  $m_N$  denotes the measured total N in the wastewater, 14 and 17 g/mol are the molar masses of N and NH<sub>3</sub>, respectively.

3. For the total P calculation in R2,

$$m_{Output\ P} = m_{Input\ P} = m_{H_3PO_4} / 98 \times 31 \quad (3)$$

where 98 and 31 g/mol are the molar masses of H<sub>3</sub>PO<sub>4</sub> and P, respectively.

4. For the total N calculation in R3,

$$m_N = m_{total\ N} - m_{NH_3} / 17 \times 14 \quad (4)$$

where  $m_{total\ N}$  refers to the total N from (NH<sub>4</sub>)<sub>2</sub>HPO<sub>4</sub> and urea,  $m_{NH_3}$  denotes the mass loss of curing.

**Table S3** Input and output data of bleached softwood kraft pulp production (1 g pulp).<sup>14</sup>

| Categories      |                           | Unit                                           | Value                        | Background data source |                                                                             |
|-----------------|---------------------------|------------------------------------------------|------------------------------|------------------------|-----------------------------------------------------------------------------|
| Input           | Materials                 | Logs (dry basis)                               | cm <sup>3</sup>              | 4.89                   | Softwood (China); lcacontest-s-unj6@ike-global.com 1.0                      |
|                 |                           | NaOH<br>(30 wt%)                               | g                            | 0.176                  | Sodium hydroxide (30%), market average (China); CLCD-China-ECER 0.8         |
|                 |                           | H <sub>2</sub> O <sub>2</sub><br>(50 wt%)      | g                            | 0.019                  | Hydrogen peroxide (50%), market average (China); CLCD-China-ECER 0.8        |
|                 |                           | H <sub>2</sub> SO <sub>4</sub><br>(98 wt%)     | g                            | 0.017                  | Sulfuric acid, market average (China); CLCD-China-ECER 0.8                  |
|                 |                           | Na <sub>2</sub> SO <sub>4</sub>                | g                            | 0.022                  | Disodium sulfate (China); CLCD-China-ECER 0.8                               |
|                 |                           | CaO                                            | g                            | 0.024                  | Lime production (China); lcacontest-s-85y6@ike-global.com 1.0               |
|                 |                           | Natural gas                                    | L                            | 0.074                  | Natural gas (China); CLCD-China-ECER 0.8                                    |
|                 | ClO <sub>2</sub> gen      | Water                                          | g                            | 44                     | Tap water (China, industrial); CLCD-China-ECER 0.8                          |
|                 |                           | NaClO <sub>3</sub><br>(available chlorine 15%) | g                            | 0.333                  | Sodium chlorate (available chlorine 15%) (China); CLCD-China-ECER 0.8       |
|                 |                           | H <sub>2</sub> SO <sub>4</sub><br>(98 wt%)     | g                            | 0.024                  | Sulfuric acid, market average (China); CLCD-China-ECER 0.8                  |
|                 |                           | CH <sub>4</sub>                                | g                            | 0.005                  | Methane (China); CLCD-China-ECER 0.8                                        |
|                 | Electricity               | Softwood kraft pulp production                 | kW·h                         | 0.350                  | China power grid transmission (China, to users); display@ike-global.com 0.9 |
|                 | Output                    | Product                                        | Bleached softwood kraft pulp | g                      | 1                                                                           |
| CO <sub>2</sub> |                           |                                                |                              |                        |                                                                             |
|                 |                           | CO <sub>2</sub> -fossil                        | g                            | 0.171                  |                                                                             |
|                 | CO <sub>2</sub> -biogenic | g                                              | 2.209                        |                        |                                                                             |

---

|            |                                 |   |          |
|------------|---------------------------------|---|----------|
| HFB        | SO <sub>2</sub>                 | g | 0.00031  |
| Waste-gas  | CH <sub>4</sub>                 | g | 0.000028 |
|            | N <sub>2</sub> O                | g | 0.000006 |
| Wastewater | Water                           | g | 44       |
|            | AOX                             | g | 0.00061  |
|            | COD                             | g | 0.051    |
|            | Total suspended-<br>solids      | g | 0.041    |
|            | Total dissolved-<br>solids      | g | 0.2      |
| Waste      | Na <sub>2</sub> SO <sub>4</sub> | g | 0.006    |

---



---

**Table S4** Selected environmental impact categories.

| <b>Impact category</b>   | <b>Abbreviation</b> | <b>Unit</b>                                      |
|--------------------------|---------------------|--------------------------------------------------|
| Climate change           | GWP                 | kg CO <sub>2</sub> eq/(1 g P-CNCs)               |
| Primary energy demand    | PED                 | MJ/(1 g P-CNCs)                                  |
| Resource depletion-water | WU                  | kg/(1 g P-CNCs)                                  |
| Acidification            | AP                  | kg SO <sub>2</sub> eq/(1 g P-CNCs)               |
| Eutrophication           | EP                  | kg PO <sub>4</sub> <sup>3-</sup> eq/(1 g P-CNCs) |
| Ecotoxicity              | ET                  | CTUe/(1 g P-CNCs)                                |

**Table S5** Prices of materials and energy used for cost calculation.

| <b>Materials</b>                                 | <b>Price</b> | <b>Unit</b> | <b>Ref.</b> |
|--------------------------------------------------|--------------|-------------|-------------|
| Softwood pulp                                    | 28000        | CNY/ton     | 15          |
| NaOH (30%)                                       | 800          | CNY/ton     | 16          |
| H <sub>2</sub> SO <sub>4</sub> (98%)             | 450          | CNY/ton     | 17          |
| H <sub>3</sub> PO <sub>4</sub> (85%)             | 6800         | CNY/ton     | 18          |
| CaO                                              | 900          | CNY/ton     | 19          |
| NaClO                                            | 7500         | CNY/ton     | 20          |
| (NH <sub>4</sub> ) <sub>2</sub> HPO <sub>4</sub> | 6500         | CNY/ton     | 21          |
| NH <sub>4</sub> H <sub>2</sub> PO <sub>4</sub>   | 5200         | CNY/ton     | 22          |
| Urea                                             | 2800         | CNY/ton     | 23          |
| Water                                            | 7.9          | CNY/ton     | 24          |
| Natural gas                                      | 5800         | CNY/ton     | 25          |
| Heat                                             | 70           | CNY/GJ      | 26          |
| Electricity                                      | 0.6768*      | CNY/(kW·h)  | 27          |

\*Classification: General commercial and other electricity consumption (single system) (less than 1kV).

**Table S6** Costs of listed materials and energy for per ton of P-CNCs.

| <b>Materials/Utilities</b>                       | <b>R1</b> | <b>R2</b> | <b>R3</b> |
|--------------------------------------------------|-----------|-----------|-----------|
| Softwood pulp                                    | 33656.0   | 35896.0   | 60592.0   |
| NaOH (30%)                                       | /         | /         | 35568.8   |
| H <sub>2</sub> SO <sub>4</sub> (98%)             | 8.1       | /         | 7509.6    |
| H <sub>3</sub> PO <sub>4</sub> (85%)             | /         | 1481135.2 | /         |
| CaO                                              | 9         | /         | /         |
| NaClO                                            | /         | /         | 532.5     |
| (NH <sub>4</sub> ) <sub>2</sub> HPO <sub>4</sub> | /         | /         | 5739.5    |
| NH <sub>4</sub> H <sub>2</sub> PO <sub>4</sub>   | 1216.8    | /         | /         |
| Urea                                             | 1363.6    | /         | 5619.6    |
| Water                                            | 2265.9    | 23649.4   | 26681.7   |
| Natural gas                                      | 696.0     | /         | /         |
| Heat                                             | 378.8     | /         | /         |
| Electricity                                      | 382392.0  | 247032    | 665294.4  |
| Total                                            | 421986.2  | 1787712.6 | 807538.1  |

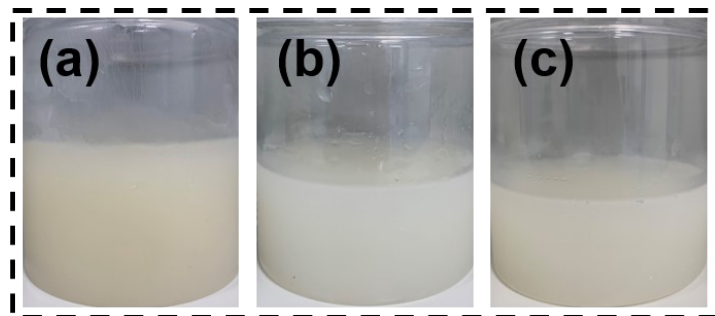

**Fig. S1** Photographs of P-CNCs prepared from different molar ratios of MCC/ $\text{NH}_4\text{H}_2\text{PO}_4$ /urea.

(a) 1:0.6:2.4 (b) 1:0.3:1.2 and (c) 1:0.15:0.6.

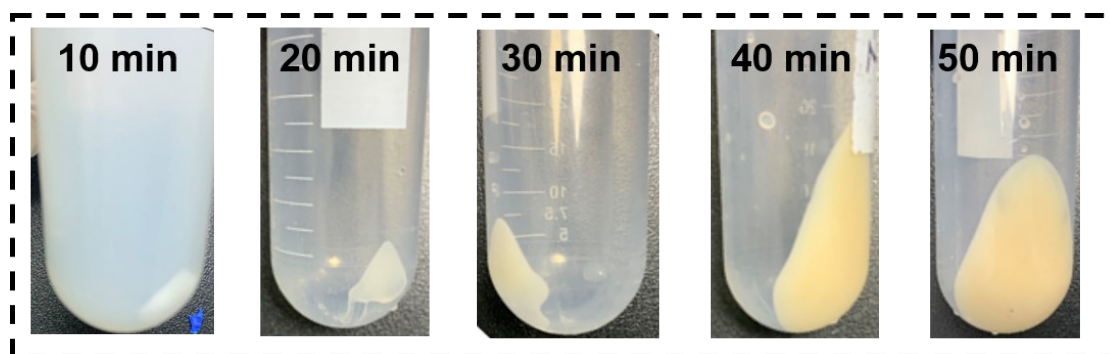

**Fig. S2** Residues of P-CNC suspensions after centrifugation prepared from different curing time.

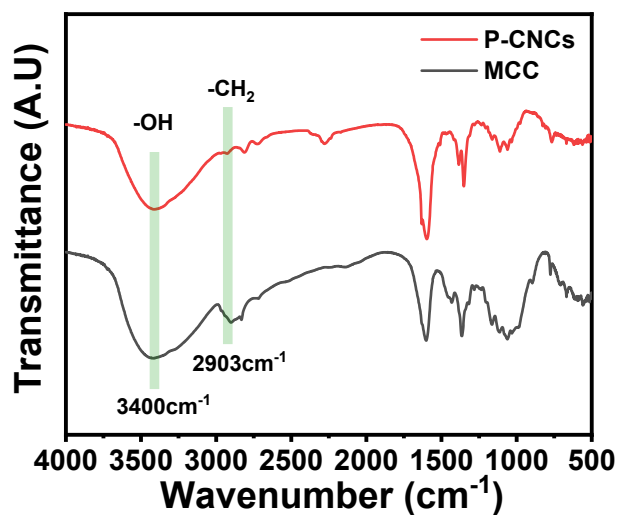

**Fig. S3** FT-IR spectra of MCC and P-CNCs.

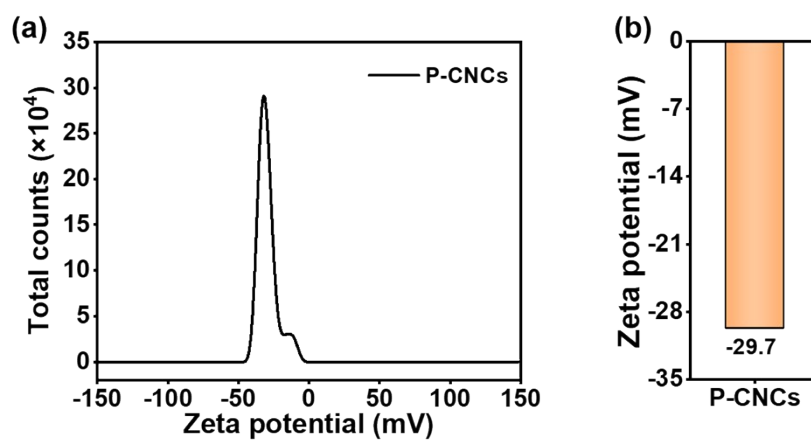

**Fig. S4** (a) Zeta potential distribution and (b) zeta potential of P-CNCs.

---

## References

1. A. Ait Benhamou, Z. Kassab, M. Nadifiyine, M. H. Salim, H. Sehaqui, A. Moubarik and M. El Achaby, *Cellulose*, 2021, **28**, 4625-4642.
2. Z. Kassab, I. Kassem, H. Hannache, R. Bouhfid, A. E. K. Qaiss and M. El Achaby, *Cellulose*, 2020, **27**, 4287-4303.
3. A. Bahloul, Z. Kassab, M. El Bouchti, H. Hannache, A. E. K. Qaiss, M. Oumam and M. El Achaby, *Carbohydr. Polym.*, 2021, **253**, 117311.
4. J. Baek, F. Wahid-Pedro, K. Kim, K. Kim and K. C. Tam, *Carbohydr. Polym.*, 2019, **206**, 520-527.
5. A. Adel, A. El-Shafei, A. Ibrahim and M. Al-Shemy, *Ind. Crops Prod.*, 2018, **124**, 155-165.
6. V. Kokol, M. Bozic, R. Vogrincic and A. P. Mathew, *Carbohydr. Polym.*, 2015, **125**, 301-313.
7. S. Camarero Espinosa, T. Kuhnt, E. J. Foster and C. Weder, *Biomacromolecules*, 2013, **14**, 1223-1230.
8. B. G. Fiss, L. Hatherly, R. S. Stein, T. Friščić and A. Moores, *ACS Sustainable Chem. Eng.*, 2019, **7**, 7951-7959.
9. L. Li, W. Ma, Y. Higaki, K. Kamitani and A. Takahara, *Langmuir*, 2018, **34**, 13361-13367.
10. M. Ghanadpour, F. Carosio, P. T. Larsson and L. Wagberg, *Biomacromolecules*, 2015, **16**, 3399-3410.
11. R. Husgafvel, K. Vanhatalo, L. Rodriguez-Chiang, L. Linkosalmi and O. Dahl, *J. Cleaner Prod.*, 2016, **126**, 620-629.
12. L. Zhang, X. Jia, Y. Ai, R. Huang, W. Qi, Z. He, J. J. Klemeš and R. Su, *J. Cleaner Prod.*, 2022, **345**, 131073.
13. Q. Q. Wang, J. Y. Zhu, R. S. Reiner, S. P. Verrill, U. Baxa and S. E. McNeil, *Cellulose*, 2012, **19**, 2033-2047.
14. D. Echeverria, R. Venditti, H. Jameel and Y. Yao, *Environ. Sci. Technol.*, 2022, **56**, 4578-4586.
15. Alibaba. Softwood pulp price.  
[https://detail.1688.com/offer/697624205.html&idx=39?spm=a312h.2018\\_new\\_sem.dh\\_002.79.1b33681aNOR9Ko&file=697624205.html&idx=39](https://detail.1688.com/offer/697624205.html&idx=39?spm=a312h.2018_new_sem.dh_002.79.1b33681aNOR9Ko&file=697624205.html&idx=39).  
Published 2022. Accessed 8 December, 2022.
16. Wan Hwa Enterprise Co., Ltd. Latest quotation of liquid caustic soda on December 8, 2022.  
<https://cn.trustexporter.com/cp-lzjzhg/o3947210.htm>.

- 
- Published 2022. Accessed 8 December, 2022.
17. Wan Hwa Enterprise Co., Ltd. Quotation of concentrated sulfuric acid on December 8, 2022.  
<https://cn.trustexporter.com/cz10738576.htm>.  
Published 2022. Accessed 8 December, 2022.
  18. Wan Hwa Enterprise Co., Ltd. Quotation of industrial phosphoric acid on December 8, 2022.  
<https://www.trustexporter.com/qitawujiyuanliao/o6789394.htm>.  
Published 2022. Accessed 8 December, 2022.
  19. Alibaba. Quick lime price.  
<https://detail.1688.com/offer/666145250755.html?spm=a26352.13672862.offerlist.14.1e0241e7QffYQP>.  
Published 2022. Accessed 8 December, 2022.
  20. Alibaba. Sodium hypochlorite price.  
<https://detail.1688.com/offer/679559957271.html?spm=a26352.13672862.offerlist.5.5d801e620U1PY8>.  
Published 2022. Accessed 8 December, 2022.
  21. Alibaba. Diammonium hydrogen phosphate price.  
[https://detail.1688.com/offer/481747417.html?spm=a26352.13672862.offerlist.24.1b5930500Z8AyW&cosite=&tracelog=p4p&\\_p\\_isad=1&clickid=33c25573151e45b4a41e9cc168668a51&sessionid=8cd47d5a5fc6ba6560d3874f30851a](https://detail.1688.com/offer/481747417.html?spm=a26352.13672862.offerlist.24.1b5930500Z8AyW&cosite=&tracelog=p4p&_p_isad=1&clickid=33c25573151e45b4a41e9cc168668a51&sessionid=8cd47d5a5fc6ba6560d3874f30851a).  
Published 2022. Accessed 8 December, 2022.
  22. Alibaba. Ammonium dihydrogen phosphate price.  
[https://detail.1688.com/offer/590202626.html?spm=a26352.13672862.offerlist.1.7bad1e62zLiK5K&cosite=&tracelog=p4p&\\_p\\_isad=1&clickid=05df92e43adc43599d566ed46ec22288&sessionid=c0d93b61607227fb3f3544796ee56d0a](https://detail.1688.com/offer/590202626.html?spm=a26352.13672862.offerlist.1.7bad1e62zLiK5K&cosite=&tracelog=p4p&_p_isad=1&clickid=05df92e43adc43599d566ed46ec22288&sessionid=c0d93b61607227fb3f3544796ee56d0a).  
Published 2022. Accessed 8 December, 2022.
  23. Alibaba. Urea price.  
<https://detail.1688.com/offer/678092763938.html?spm=a26352.13672862.offerlist.12.239b6462slTbo4>.  
Published 2022. Accessed 8 December, 2022.
  24. Tianjin Development and reform commission. Water price.  
[https://fzgg.tj.gov.cn/zmhd/gzcx/syjgcx/gs/202009/t20200923\\_3807282.html](https://fzgg.tj.gov.cn/zmhd/gzcx/syjgcx/gs/202009/t20200923_3807282.html).  
Published 2017. Accessed 8 December, 2022.
  25. Tianjin Development and Reform Commission. Notice of the Municipal Development

---

and Reform Commission on the announcement of the sales price of natural gas for non-residents in the urban gas pipe network in the 2022-2023 heating season.

[https://fzgg.tj.gov.cn/zmhd/gzcx/syjgcx/trq/202211/t20221129\\_6045936.html](https://fzgg.tj.gov.cn/zmhd/gzcx/syjgcx/trq/202211/t20221129_6045936.html).

Published 2022. Accessed 8 December, 2022.

26. Tianjin Development and Reform Commission. Heating price.

[https://fzgg.tj.gov.cn/zmhd/gzcx/syjgcx/gr/202009/t20200923\\_3807284.html](https://fzgg.tj.gov.cn/zmhd/gzcx/syjgcx/gr/202009/t20200923_3807284.html).

Published 2016. Accessed 8 December, 2022.

27. Tianjin Development and Reform Commission. Notice of the Municipal Development and Reform Commission on matters related to the implementation of the power transmission and distribution price policy to reduce the power price of large industries.

[https://fzgg.tj.gov.cn/zmhd/gzcx/syjgcx/gd/202101/t20210104\\_5284092.html](https://fzgg.tj.gov.cn/zmhd/gzcx/syjgcx/gd/202101/t20210104_5284092.html).

Published 2020. Accessed 8 December, 2022.
